# Supplementary material
Source: PubMed Central journal article supplement (PMC6399058)
Supplement: NIHMS1517246-supplement-1.pdf [file NIHMS1517246-supplement-1.pdf]

**Supplementary table S1:** Baseline Characteristics by whether participant had baseline biomarkers and good quality spirometry.

|                                             | Had Baseline Biomarker and acceptable spirometry |                          |                          |
|---------------------------------------------|--------------------------------------------------|--------------------------|--------------------------|
|                                             | Yes                                              | No                       | Total                    |
|                                             | N (%) or<br>Median (IQR)                         | N (%) or<br>Median (IQR) | N (%) or<br>Median (IQR) |
| <b>No. of participants</b>                  | 903 (91.2%)                                      | 87 (8.8%)                | 990 (100.0%)             |
| <b><u>Demographics</u></b>                  |                                                  |                          |                          |
| Age (years)                                 | 36 (30, 44)                                      | 38 (31, 44)              | 36 (30, 44)              |
| Female                                      | 254 (28.1%)                                      | 38 (43.7%)               | 292 (29.5%)              |
| Race                                        |                                                  |                          |                          |
| Black                                       | 345 (38.2%)                                      | 36 (41.4%)               | 381 (38.5%)              |
| Latino/Hispanic                             | 158 (17.5%)                                      | 13 (14.9%)               | 171 (17.3%)              |
| Asian                                       | 87 (9.6%)                                        | 17 (19.5%)               | 104 (10.5%)              |
| White                                       | 304 (33.7%)                                      | 20 (23.0%)               | 324 (32.7%)              |
| Other                                       | 9 (1.0%)                                         | 1 (1.1%)                 | 10 (1.0%)                |
| <b><u>Region</u></b>                        |                                                  |                          |                          |
| Africa                                      | 287 (31.8%)                                      | 35 (40.2%)               | 322 (32.5%)              |
| Asia                                        | 85 (9.4%)                                        | 17 (19.5%)               | 102 (10.3%)              |
| Europe/Israel/Australia                     | 282 (31.2%)                                      | 16 (18.4%)               | 298 (30.1%)              |
| Mexico/South America                        | 169 (18.7%)                                      | 14 (16.1%)               | 183 (18.5%)              |
| United States                               | 80 (8.9%)                                        | 5 (5.7%)                 | 85 (8.6%)                |
| <b><u>HIV history</u></b>                   |                                                  |                          |                          |
| Likely mode of HIV infection                |                                                  |                          |                          |
| Injection drug use                          | 13 (1.4%)                                        | 1 (1.1%)                 | 14 (1.4%)                |
| Male sexual contact with person of same sex | 454 (50.3%)                                      | 28 (32.2%)               | 482 (48.7%)              |
| Sexual contact with person of opposite sex  | 393 (43.5%)                                      | 46 (52.9%)               | 439 (44.3%)              |

|                    |                |                |                |
|--------------------|----------------|----------------|----------------|
| Other/unknown      | 43 (4.8%)      | 12 (13.8%)     | 55 (5.6%)      |
| Years HIV positive | 1.2 (0.4, 3.5) | 1.1 (0.4, 4.4) | 1.2 (0.4, 3.5) |

### **Lab results**

|                                    |                   |                   |                   |
|------------------------------------|-------------------|-------------------|-------------------|
| CD4 count (cells/mm <sup>3</sup> ) | 647 (584, 766)    | 671 (590, 801)    | 649 (584, 769)    |
| CD8 count (cells/mm <sup>3</sup> ) | 1026 (760, 1411)  | 902 (750, 1225)   | 1017 (758, 1399)  |
| CD4/CD8 ratio                      | 0.66 (0.47, 0.93) | 0.75 (0.54, 1.02) | 0.66 (0.48, 0.94) |
| Nadir CD4 (cells/mm <sup>3</sup> ) | 550 (482, 659)    | 594 (516, 685)    | 553 (486, 663)    |
| Log HIV-RNA (copies/ml)            | 4.2 (3.5, 4.7)    | 4.0 (3.3, 4.6)    | 4.2 (3.5, 4.7)    |
| HIV-RNA ≤ 400 copies/mL            | 87 (9.6%)         | 10 (11.8%)        | 97 (9.8%)         |

### **Smoking history**

|                                                   |                 |                 |                 |
|---------------------------------------------------|-----------------|-----------------|-----------------|
| Current smoker                                    | 257 (28.5%)     | 17 (19.5%)      | 274 (27.7%)     |
| Previous smoker                                   | 101 (11.2%)     | 8 (9.2%)        | 109 (11.0%)     |
| Never smoked                                      | 545 (60.4%)     | 62 (71.3%)      | 607 (61.3%)     |
| Pack years smoking (all participants)             | 0.0 (0.0, 4.0)  | 0.0 (0.0, 0.6)  | 0.0 (0.0, 3.5)  |
| Pack years smoking (current and previous smokers) | 6.5 (2.0, 15.0) | 5.0 (2.0, 12.0) | 6.0 (2.0, 15.0) |
| Currently smokes cigars, cigarillos, or a pipe    | 44 (4.9%)       | 2 (2.3%)        | 46 (4.6%)       |
| Prior CVD                                         | 7 (0.8%)        | 0 (0.0%)        | 7 (0.7%)        |

### **Medical history**

|                                                |                   |                   |                   |
|------------------------------------------------|-------------------|-------------------|-------------------|
| Body mass index (kg/m <sup>2</sup> )           | 24.8 (22.2, 28.4) | 24.9 (22.1, 29.1) | 24.8 (22.2, 28.4) |
| Hypertension                                   | 169 (18.7%)       | 14 (16.1%)        | 183 (18.5%)       |
| Diabetes                                       | 32 (3.5%)         | 4 (4.6%)          | 36 (3.6%)         |
| Hepatitis B                                    | 39 (4.4%)         | 4 (4.8%)          | 43 (4.4%)         |
| Hepatitis C                                    | 28 (3.2%)         | 0 (0.0%)          | 28 (2.9%)         |
| Hepatitis B or C                               | 66 (7.3%)         | 4 (4.8%)          | 70 (7.1%)         |
| Osteoporosis                                   | 3 (0.3%)          | 0 (0.0%)          | 3 (0.3%)          |
| Recent respiratory illness                     | 242 (26.8%)       | 20 (23.0%)        | 262 (26.5%)       |
| Felt downhearted and depressed in past 4 weeks | 294 (37.0%)       | 22 (29.3%)        | 316 (36.4%)       |

### **Respiratory History**

Spirometry grade

|                                                 |                    |                    |                    |
|-------------------------------------------------|--------------------|--------------------|--------------------|
| A                                               | 509 (56.4%)        | 47 (54.0%)         | 556 (56.2%)        |
| B                                               | 202 (22.4%)        | 18 (20.7%)         | 220 (22.2%)        |
| C                                               | 192 (21.3%)        | 22 (25.3%)         | 214 (21.6%)        |
| FEV <sub>1</sub> (L)                            | 3.4 (2.7, 4.0)     | 3.0 (2.3, 3.7)     | 3.4 (2.7, 4.0)     |
| FVC (L)                                         | 4.1 (3.3, 4.9)     | 3.5 (2.7, 4.5)     | 4.1 (3.3, 4.9)     |
| FEV <sub>1</sub> /FVC ratio <sup>1</sup>        | 0.83 (0.78, 0.86)  | 0.84 (0.79, 0.87)  | 0.83 (0.78, 0.86)  |
| < 0.7                                           | 50 (5.5%)          | 4 (4.6%)           | 54 (5.5%)          |
| 95% C.I.                                        | 4.1, 7.1           | 4.1, 8.5           | 3.1, 7.2           |
| < lower limit or normal                         | 60 (6.6%)          | 7 (8.0%)           | 67 (6.8%)          |
| 95% C.I.                                        | 5.3, 8.5           | 5.8, 10.8          | 3.6, 7.9           |
| FEV <sub>1</sub> as % of predicted <sup>1</sup> | 96.6 (86.0, 104.0) | 92.4 (82.6, 102.3) | 96.1 (85.4, 103.8) |
| ≥ 80%                                           | 778 (86.2%)        | 74 (85.1%)         | 852 (86.1%)        |
| 50% - 79%                                       | 119 (13.2%)        | 13 (14.9%)         | 132 (13.3%)        |
| 30% - 49%                                       | 6 (0.7%)           | 0 (0.0%)           | 6 (0.6%)           |
| < 30%                                           | 0 (0.0%)           | 0 (0.0%)           | 0 (0.0%)           |

**Supplementary Table S2:** Longitudinal analyses limited to deferred arm of START pulmonary substudy with lung function data censored after initiation of ART. Univariable (unadjusted) and multivariable<sup>1</sup> (adjusted) linear regression of longitudinal changes in FEV<sub>1</sub> (mL/yr), FVC (mL/yr), and FEV<sub>1</sub>/FVC (x1000/yr) on log<sub>2</sub>-transformed baseline biomarkers.

|                                  | <i>Univariable</i> |                  |             | <i>Multivariable<sup>1</sup></i> |              |         |
|----------------------------------|--------------------|------------------|-------------|----------------------------------|--------------|---------|
|                                  | $\beta^3$          | 95% C.I.         | P-value     | $\beta^3$                        | 95% C.I.     | P-value |
| <b>FEV<sub>1</sub> Slope</b>     |                    |                  |             |                                  |              |         |
| D-dimer (mcg/ml)                 | 5.5                | -12.0, 23.0      | 0.54        | 3.2                              | -14.0, 20.5  | 0.71    |
| hsCRP (mcg/ml)                   | 3.8                | -5.6, 13.3       | 0.42        | 3.5                              | -5.8, 12.8   | 0.46    |
| IL-6 (pg/ml)                     | -6.8               | -25.1, 11.4      | 0.46        | -5.4                             | -23.3, 12.6  | 0.56    |
| IL-27 (pg/ml)                    | 0.0                | -9.3, 9.3        | 1.00        | -1.0                             | -10.1, 8.1   | 0.83    |
| Serum amyloid A (mg/L)           | -0.5               | -11.4, 10.3      | 0.93        | -0.5                             | -11.2, 10.3  | 0.93    |
| sICAM-1 (mcg/mL)                 | <b>31.3</b>        | <b>4.3, 58.3</b> | <b>0.02</b> | 24.2                             | -2.3, 50.8   | 0.07    |
| sVCAM-1 (mcg/mL)                 | 7.1                | -19.8, 34.1      | 0.60        | 3.9                              | -22.6, 30.4  | 0.77    |
| IL-6/D-dimer score <sup>2</sup>  | -7.4               | -51.6, 36.8      | 0.74        | -6.6                             | -50.1, 37.0  | 0.77    |
| Albumin (g/dL)                   | 20.5               | -108, 148.7      | 0.75        | 33.9                             | -93.3, 161.2 | 0.60    |
| Total bilirubin (mg/dL)          | -8.4               | -30.6, 13.8      | 0.46        | -4.2                             | -25.9, 17.6  | 0.71    |
| <b>FVC Slope</b>                 |                    |                  |             |                                  |              |         |
| D-dimer (mcg/ml)                 | 12.0               | -7.9, 32.0       | 0.24        | 9.6                              | -10.1, 29.2  | 0.34    |
| hsCRP (mcg/ml)                   | 0.7                | -9.9, 11.3       | 0.90        | 0.4                              | -10.1, 11.0  | 0.94    |
| IL-6 (pg/ml)                     | -6.4               | -27.2, 14.4      | 0.55        | -3.6                             | -24.0, 16.8  | 0.73    |
| IL-27 (pg/ml)                    | -0.1               | -10.7, 10.4      | 0.98        | -2.1                             | -12.4, 8.3   | 0.70    |
| Serum amyloid A (mg/L)           | -3.7               | -16.0, 8.6       | 0.55        | -3.6                             | -15.7, 8.6   | 0.57    |
| sICAM-1 (mcg/mL)                 | <b>35.2</b>        | <b>4.6, 65.7</b> | <b>0.02</b> | 28.7                             | -1.2, 58.7   | 0.06    |
| sVCAM-1 (mcg/mL)                 | 6.7                | -23.9, 37.3      | 0.67        | 4.2                              | -25.8, 34.2  | 0.79    |
| IL-6/D-dimer score <sup>2</sup>  | -0.1               | -50.4, 50.3      | 1.00        | 2.7                              | -46.8, 52.2  | 0.91    |
| Albumin (g/dL)                   | 38.5               | -107, 184.3      | 0.60        | 56.3                             | -88.0, 200.6 | 0.44    |
| Total bilirubin (mg/dL)          | -10.6              | -35.9, 14.7      | 0.41        | -6.0                             | -30.7, 18.8  | 0.64    |
| <b>FEV<sub>1</sub>/FVC Slope</b> |                    |                  |             |                                  |              |         |
| D-dimer (mcg/ml)                 | -1.4               | -3.8, 0.9        | 0.22        | -1.6                             | -3.9, 0.7    | 0.17    |
| hsCRP (mcg/ml)                   | 0.4                | -0.8, 1.6        | 0.49        | 0.5                              | -0.7, 1.7    | 0.42    |

|                                 |      |             |      |      |             |      |
|---------------------------------|------|-------------|------|------|-------------|------|
| IL-6 (pg/ml)                    | -0.5 | -2.8, 1.9   | 0.68 | -0.8 | -3.1, 1.6   | 0.51 |
| IL-27 (pg/ml)                   | 0.4  | -0.8, 1.6   | 0.53 | 0.4  | -0.8, 1.6   | 0.54 |
| Serum amyloid A (mg/L)          | 0.6  | -0.9, 2.0   | 0.44 | 0.5  | -1.0, 1.9   | 0.51 |
| sICAM-1 (mcg/mL)                | -0.2 | -3.6, 3.3   | 0.93 | 0.0  | -3.5, 3.5   | 1.00 |
| sVCAM-1 (mcg/mL)                | -0.2 | -3.6, 3.3   | 0.91 | -0.2 | -3.7, 3.3   | 0.91 |
| IL-6/D-dimer score <sup>2</sup> | -2.2 | -7.9, 3.5   | 0.44 | -2.9 | -8.6, 2.8   | 0.32 |
| Albumin (g/dL)                  | 1.0  | -15.9, 17.9 | 0.91 | 0.0  | -17.0, 17.0 | 1.00 |
| Total bilirubin (mg/dL)         | 0.2  | -2.7, 3.1   | 0.87 | 0.4  | -2.5, 3.3   | 0.79 |

<sup>1</sup> adjusted for age, sex, race, region, smoking status, CD4+ T-cell count, and HIV-RNA.

<sup>2</sup> [0.33 x log<sub>2</sub> IL-6 + 0.16 x log<sub>2</sub> D-dimer] [17]

<sup>3</sup> β represent the difference in lung function slope (FEV<sub>1</sub>, FVC, or FEV<sub>1</sub>/FVC) associated with a doubling of the corresponding biomarker
